# Supplementary material for: C-Reactive Protein Levels in Systemic Lupus Erythematosus Are Modulated by the Interferon Gene Signature and CRP Gene Polymorphism rs1205
Source: Front Immunol. 2021 Jan 28;11:622326. doi: 10.3389/fimmu.2020.622326 (PMC7876312; doi:10.3389/fimmu.2020.622326)
Supplement: Supplementary file 1 [file DataSheet_1.xlsx]

## Sheet: Gene expression
	Gene expression (2^-ΔΔCt) Expressed in relation to the control sample* (patient gene expression / control sample gene expression) *The control sample is a mix of four healthy donor RNA, run on every rtPCR plate				Log10(gene expression)				Log10(gene expression)
Patient	IFI27	RSAD2	IFI44	IFI44L	IFI27	RSAD2	IFI44	IFI44L	mean value of the four genes
1	3.47	0.67	0.82	1.06	0.540329	-0.173925	-0.0861861	0.0253059	0.076381
12	248	8.3	6.55	23.52	2.39445	0.919078	0.816241	1.37144	1.3753
21	4.94	0.57	0.616	0.63	0.693727	-0.244125	-0.210419	-0.200659	0.00963077
24	751.8	8.81	7.35	24.43	2.8761	0.944976	0.866287	1.38792	1.51882
25	9.08	0.47	0.93	0.58	0.958086	-0.327902	-0.0315171	-0.236572	0.0905237
27	13.45	2.07	3.34	7.13	1.12872	0.31597	0.523746	0.85309	0.705382
51	3.1	0.93	1.03	0.95	0.491362	-0.0315171	0.0128372	-0.0222764	0.112601
67	0.92	1.39	3.1	4.82	-0.0362122	0.143015	0.491362	0.683047	0.320303
68	78.9	4.84	4.63	8.56	1.89708	0.684845	0.665581	0.932474	1.04499
83	15.68	1.18	1.57	3.05	1.19535	0.071882	0.1959	0.4843	0.486857
90	581	9.39	8.58	26.53	2.76418	0.972666	0.933487	1.42374	1.52352
92	31.67	2.87	3.6	7.23	1.50065	0.457882	0.556303	0.859138	0.843493
94	23.1	3.02	4.02	8.87	1.36361	0.480007	0.604226	0.947924	0.848942
106	98.28	6.78	7.35	13.9	1.99247	0.83123	0.866287	1.14301	1.20825
107	0.48	0.49	0.82	0.38	-0.318759	-0.309804	-0.0861861	-0.420216	-0.283741
112	1.58	0.76	1.26	1.28	0.198657	-0.119186	0.100371	0.10721	0.0717628
114	23.03	2.62	2.67	3.37	1.36229	0.418301	0.426511	0.52763	0.683684
117	0.75	0.27	0.76	0.6	-0.124939	-0.568636	-0.119186	-0.221849	-0.258653
130	11.41	2.87	3.98	9.44	1.05729	0.457882	0.599883	0.974972	0.772506
157	288	6.9	7.99	17.47	2.45939	0.838849	0.902547	1.24229	1.36077
161	4.1	1	1.24	1.21	0.612784	0	0.0934217	0.0827854	0.197248
176	17.18	6.63	4.27	8.42	1.23502	0.821514	0.630428	0.925312	0.903069
178	1.92	0.63	1.04	0.851	0.283301	-0.200659	0.0170333	-0.0700704	0.00740117
196	0.154	0.11	0.29	0.84	-0.812479	-0.958607	-0.537602	-0.0757207	-0.596102
200	0.59	0.3	0.55	0.48	-0.229148	-0.522879	-0.259637	-0.318759	-0.332606
203	18.57	4.1	4.15	7.54	1.26881	0.612784	0.618048	0.877371	0.844254
208	9.62	3.2	4.07	9.07	0.983175	0.50515	0.609594	0.957607	0.763882
209	50.76	3.64	5.71	12.8	1.70552	0.561101	0.756636	1.10721	1.03262
210	39.46	3.91	4.4	9.97	1.59616	0.592177	0.643453	0.998695	0.95762
212	4.83	0.74	1.01	0.93	0.683947	-0.130768	0.00432137	-0.0315171	0.131496
214	2.37	0.41	0.77	0.7	0.374748	-0.387216	-0.113509	-0.154902	-0.0702198
217	12.23	3.66	2.97	5.45	1.08743	0.563481	0.472756	0.736397	0.715015
218	7.64	0.88	1.44	1.16	0.883093	-0.0555173	0.158362	0.064458	0.262599
220	1460	21.27	18.03	34.21	3.16435	1.32777	1.256	1.53415	1.82057
226	21	2.8	2.85	4.98	1.32222	0.447158	0.454845	0.697229	0.730363
228	208.45	7.85	8.93	21.7	2.319	0.89487	0.950851	1.33646	1.3753
235	2.95	0.81	1.38	1.17	0.469822	-0.091515	0.139879	0.0681859	0.146593
240	592.1	14.1	10.71	38.77	2.7724	1.14922	1.02979	1.5885	1.63497
248	414	10.34	1.29	28.7	2.617	1.01452	0.11059	1.45788	1.3
250	9.32	2.12	2.91	10.73	0.969416	0.326336	0.463893	1.0306	0.697561
251	142.13	4.75	6.36	16.01	2.15269	0.676694	0.803457	1.20439	1.20931
255	35.63	2.78	3.06	6.04	1.55182	0.444045	0.485721	0.781037	0.815655
257	28.3	2.48	3.57	7.54	1.45179	0.394452	0.552668	0.877371	0.819069
258	220	13.25	11.47	32.11	2.34242	1.12222	1.05956	1.50664	1.50771
263	15.11	4.08	4.11	7.98	1.17926	0.61066	0.613842	0.902003	0.826442
267	155.5	11.35	13.26	33.87	2.19173	1.055	1.12254	1.52982	1.47477
271	276	9.7	9.81	24.5	2.44091	0.986772	0.991669	1.38917	1.45213
273	35.55	2.03	2.26	8.66	1.55084	0.307496	0.354108	0.937518	0.78749
275	137	10.02	9.02	21.88	2.13672	1.00087	0.955207	1.34005	1.35821
276	116	7.27	7.7	19	2.06446	0.861534	0.886491	1.27875	1.27281
279	1.88	0.61	1	0.91	0.274158	-0.21467	0	-0.0409586	0.00463227
280	3083	17.78	10.38	24.43	3.48897	1.24993	1.0162	1.38792	1.78576
281	0.45	0.46	0.79	0.41	-0.346787	-0.337242	-0.102373	-0.387216	-0.293405
285	6.13	0.57	0.92	0.76	0.78746	-0.244125	-0.0362122	-0.119186	0.0969842
286	11.17	5.2	4.6	6.47	1.04805	0.716003	0.662758	0.810904	0.80943
288	138	6.94	6.25	14.52	2.13988	0.841359	0.79588	1.16197	1.23477
289	4.06	0.6	0.93	1.38	0.608526	-0.221849	-0.0315171	0.139879	0.12376

## Sheet: raw data
Raw data from rtPCR. Sample numbers correspond to Patient numbers.
Plate 1
Well	Sample Name	Target Name	Cт
A1	Control	IFI27	34.9987
A2	Control	IFI27	34.9673
A3	Control	RSAD2	31.0164
A4	Control	RSAD2	30.9619
A5	Control	IFI44	29.4665
A6	Control	IFI44	29.4769
A7	Control	IFI44L	30.201
A8	Control	IFI44L	30.24
A9	Control	GAPDH	22.471
A10	Control	GAPDH	22.1632
C1	67	IFI27	36.7074
C2	67	IFI27	36.7887
C3	67	RSAD2	32.1533
C4	67	RSAD2	32.1402
C5	67	IFI44	29.4936
C6	67	IFI44	29.4595
C7	67	IFI44L	29.5893
C8	67	IFI44L	29.5932
C9	67	GAPDH	23.9545
C10	67	GAPDH	23.9821
D1	94	IFI27	30.585
D2	94	IFI27	30.7271
D3	94	RSAD2	29.6097
D4	94	RSAD2	29.5785
D5	94	IFI44	27.6628
D6	94	IFI44	27.6716
D7	94	IFI44L	27.2189
D8	94	IFI44L	27.3349
D9	94	GAPDH	22.5469
D10	94	GAPDH	22.5049
E1	112	IFI27	35.5721
E2	112	IFI27	35.1974
E3	112	RSAD2	32.4385
E4	112	RSAD2	32.428
E5	112	IFI44	30.2403
E6	112	IFI44	30.1538
E7	112	IFI44L	30.8711
E8	112	IFI44L	30.9719
E9	112	GAPDH	23.4016
E10	112	GAPDH	23.3587
F1	27	IFI27	32.5779
F2	27	IFI27	32.6867
F3	27	RSAD2	31.3529
F4	27	RSAD2	31.3203
F5	27	IFI44	29.1474
F6	27	IFI44	29.1149
F7	27	IFI44L	28.74
F8	27	IFI44L	28.8335
F9	27	GAPDH	23.6562
F10	27	GAPDH	23.7771
G1	285	IFI27	33.251
G2	285	IFI27	32.8042
G3	285	RSAD2	32.5144
G4	285	RSAD2	32.3873
G5	285	IFI44	30.2037
G6	285	IFI44	30.2959
G7	285	IFI44L	31.3022
G8	285	IFI44L	31.2464
G9	285	GAPDH	22.9708
G10	285	GAPDH	22.9884
H1	130	IFI27	32.338
H2	130	IFI27	32.315
H3	130	RSAD2	30.2784
H4	130	RSAD2	30.3689
H5	130	IFI44	28.3217
H6	130	IFI44	28.3461
H7	130	IFI44L	27.8117
H8	130	IFI44L	27.8621
H9	130	GAPDH	23.1623
H10	130	GAPDH	23.183
Plate 2
Well	Sample Name	Target Name	Cт
A1	Control	IFI27	35.1067
A2	Control	IFI27	34.811
A3	Control	RSAD2	30.8569
A4	Control	RSAD2	30.8455
A5	Control	IFI44	29.064
A6	Control	IFI44	29.0147
A7	Control	IFI44L	29.7119
A8	Control	IFI44L	29.6213
A9	Control	GAPDH	22.4428
A10	Control	GAPDH	22.2932
B1	271	IFI27	27.6118
B2	271	IFI27	27.6022
B3	271	RSAD2	28.369
B4	271	RSAD2	28.2966
B5	271	IFI44	26.4818
B6	271	IFI44	26.5263
B7	271	IFI44L	25.7661
B8	271	IFI44L	25.8565
B9	271	GAPDH	22.9638
B10	271	GAPDH	23.2922
C1	258	IFI27	26.948
C2	258	IFI27	26.9268
C3	258	RSAD2	26.9763
C4	258	RSAD2	26.7977
C5	258	IFI44	25.2939
C6	258	IFI44	25.2734
C7	258	IFI44L	24.5228
C8	258	IFI44L	24.3291
C9	258	GAPDH	22.2175
C10	258	GAPDH	22.047
D1	218	IFI27	32.5975
D2	218	IFI27	32.8368
D3	218	RSAD2	31.6884
D4	218	RSAD2	31.7549
D5	218	IFI44	29.1548
D6	218	IFI44	29.2464
D7	218	IFI44L	30.0954
D8	218	IFI44L	30.1943
D9	218	GAPDH	23.05
D10	218	GAPDH	23.0722
E1	235	IFI27	33.096
E2	235	IFI27	33.5217
E3	235	RSAD2	31.0158
E4	235	RSAD2	31.1215
E5	235	IFI44	28.4822
E6	235	IFI44	28.4791
E7	235	IFI44L	29.3217
E8	235	IFI44L	29.3802
E9	235	GAPDH	22.2469
E10	235	GAPDH	22.315
F1	275	IFI27	28.5569
F2	275	IFI27	28.536
F3	275	RSAD2	28.2218
F4	275	RSAD2	28.2028
F5	275	IFI44	26.5229
F6	275	IFI44	26.5792
F7	275	IFI44L	25.9247
F8	275	IFI44L	25.8768
F9	275	GAPDH	23.0355
F10	275	GAPDH	23.0725
G1	35	IFI27	31.9351
G2	35	IFI27	32.1374
G3	35	RSAD2	32.1347
G4	35	RSAD2	32.2168
G5	35	IFI44	29.3924
G6	35	IFI44	29.4114
G7	35	IFI44L	30.8401
G8	35	IFI44L	30.5814
G9	35	GAPDH	22.5654
G10	35	GAPDH	22.6917
H1	286	IFI27	32.0438
H2	286	IFI27	31.951
H3	286	RSAD2	28.985
H4	286	RSAD2	29.0029
H5	286	IFI44	27.2845
H6	286	IFI44	27.4092
H7	286	IFI44L	27.4519
H8	286	IFI44L	27.5327
H9	286	GAPDH	22.7103
H10	286	GAPDH	23.0679
Plate 3
Well	Sample Name	Target Name	Cт
A1	Control	IFI27	35.0282
A2	Control	IFI27	34.4232
A3	Control	RSAD2	30.8745
A4	Control	RSAD2	30.6593
A5	Control	IFI44	29.084
A6	Control	IFI44	29.0345
A7	Control	IFI44L	29.4854
A8	Control	IFI44L	29.7036
A9	Control	GAPDH	22.4579
A10	Control	GAPDH	22.317
B1	90	IFI27	25.0043
B2	90	IFI27	24.9644
B3	90	RSAD2	26.974
B4	90	RSAD2	26.9798
B5	90	IFI44	25.3906
B6	90	IFI44	25.4072
B7	90	IFI44L	24.2261
B8	90	IFI44L	24.3868
B9	90	GAPDH	21.8487
B10	90	GAPDH	21.8092
C1	114	IFI27	29.966
C2	114	IFI27	29.9659
C3	114	RSAD2	29.1299
C4	114	RSAD2	29.1588
C5	114	IFI44	27.3932
C6	114	IFI44	27.4162
C7	114	IFI44L	27.4874
C8	114	IFI44L	27.7282
C9	114	GAPDH	21.3315
C10	114	GAPDH	22.9751
D1	212	IFI27	32.3382	Patient sample was re-analyzed on plate 9 due to undetermined GADPH value
D2	212	IFI27	32.4627
D3	212	RSAD2	29.5647
D4	212	RSAD2	29.5703
D5	212	IFI44	27.8173
D6	212	IFI44	27.7042
D7	212	IFI44L	27.9274
D8	212	IFI44L	27.8894
D9	212	GAPDH	Undetermined
D10	212	GAPDH	39.3991
E1	203	IFI27	30.619
E2	203	IFI27	30.5502
E3	203	RSAD2	28.8078
E4	203	RSAD2	28.8105
E5	203	IFI44	27.1161
E6	203	IFI44	27.0448
E7	203	IFI44L	26.7431
E8	203	IFI44L	26.7658
E9	203	GAPDH	22.513
E10	203	GAPDH	22.4108
F1	220	IFI27	24.8322
F2	220	IFI27	24.8408
F3	220	RSAD2	26.9617
F4	220	RSAD2	26.9961
F5	220	IFI44	25.3808
F6	220	IFI44	25.6389
F7	220	IFI44L	25.082
F8	220	IFI44L	25.1601
F9	220	GAPDH	23.0144
F10	220	GAPDH	23.0066
G1	106	IFI27	28.2701
G2	106	IFI27	28.305
G3	106	RSAD2	28.2193
G4	106	RSAD2	28.1541
G5	106	IFI44	26.4163
G6	106	IFI44	26.3074
G7	106	IFI44L	25.962
G8	106	IFI44L	25.9932
G9	106	GAPDH	22.6035
G10	106	GAPDH	22.5327
H1	107	IFI27	36.5101
H2	107	IFI27	35.7661
H3	107	RSAD2	32.1908
H4	107	RSAD2	32.0981
H5	107	IFI44	29.6507
H6	107	IFI44	29.7563
H7	107	IFI44L	31.3511
H8	107	IFI44L	31.3191
H9	107	GAPDH	22.7325
H10	107	GAPDH	22.744
Plate 4
Well	Sample Name	Target name	Cт
A1	Control	IFI27	34.9138
A2	Control	IFI27	35.0377
A3	Control	RSAD2	30.7023
A4	Control	RSAD2	30.6373
A5	Control	IFI44	28.6945
A6	Control	IFI44	28.9886
A7	Control	IFI44L	29.6655
A8	Control	IFI44L	29.6141
A9	Control	GAPDH	22.6051
A10	Control	GAPDH	22.6168
B1	255	IFI27	30.618
B2	255	IFI27	30.4439
B3	255	RSAD2	29.8639
B4	255	RSAD2	29.9464
B5	255	IFI44	27.9656
B6	255	IFI44	27.9085
B7	255	IFI44L	27.6476
B8	255	IFI44L	27.8599
B9	255	GAPDH	23.3055
B10	255	GAPDH	23.3366
C1	200	IFI27	35.8003
C2	200	IFI27	35.9288
C3	200	RSAD2	32.4307
C4	200	RSAD2	32.6268
C5	200	IFI44	29.8579
C6	200	IFI44	29.8294
C7	200	IFI44L	30.7722
C8	200	IFI44L	30.8677
C9	200	GAPDH	22.7437
C10	200	GAPDH	22.7447
D1	12	IFI27	26.8807
D2	12	IFI27	26.8729
D3	12	RSAD2	27.4792
D4	12	RSAD2	27.4563
D5	12	IFI44	25.9873
D6	12	IFI44	25.9786
D7	12	IFI44L	24.872
D8	12	IFI44L	25.002
D9	12	GAPDH	22.4689
D10	12	GAPDH	22.4587
E1	21	IFI27	32.0687
E2	21	IFI27	32.2321
E3	21	RSAD2	30.8864
E4	21	RSAD2	31.0074
E5	21	IFI44	29.0564
E6	21	IFI44	28.9783
E7	21	IFI44L	29.7581
E8	21	IFI44L	29.7911
E9	21	GAPDH	22.1066
E10	21	GAPDH	22.0699
F1	83	IFI27	31.4497
F2	83	IFI27	31.4958
F3	83	RSAD2	30.9074
F4	83	RSAD2	30.898
F5	83	IFI44	28.6233
F6	83	IFI44	28.6967
F7	83	IFI44L	28.4193
F8	83	IFI44L	28.5763
F9	83	GAPDH	23.1044
F10	83	GAPDH	23.0526
G1	217	IFI27	30.7826
G2	217	IFI27	30.7395
G3	217	RSAD2	28.2504
G4	217	RSAD2	28.1407
G5	217	IFI44	26.6911
G6	217	IFI44	26.6422
G7	217	IFI44L	26.5356
G8	217	IFI44L	26.6454
G9	217	GAPDH	21.9897
G10	217	GAPDH	22.0268
H1	263	IFI27	31.1997
H2	263	IFI27	31.2695
H3	263	RSAD2	28.8027
H4	263	RSAD2	28.8295
H5	263	IFI44	26.8813
H6	263	IFI44	27.0782
H7	263	IFI44L	26.8056
H8	263	IFI44L	26.8337
H9	263	GAPDH	22.5292
H10	263	GAPDH	23.0456
Plate 5
Well	Sample Name	Target Name	Cт
A1	Control	IFI27	35.1367
A2	Control	IFI27	35.5446
A3	Control	RSAD2	31.0929
A4	Control	RSAD2	31.098
A5	Control	IFI44	29.3697
A6	Control	IFI44	29.5263
A7	Control	IFI44L	30.1571
A8	Control	IFI44L	30.0922
A9	Control	GADPH	22.6928
A10	Control	GADPH	22.7137
B1	288	IFI27	28.9087
B2	288	IFI27	28.8617
B3	288	RSAD2	28.9548
B4	288	RSAD2	28.9671
B5	288	IFI44	27.4092
B6	288	IFI44	27.5205
B7	288	IFI44L	26.9046
B8	288	IFI44L	26.9468
B9	288	GADPH	23.2697
B10	288	GADPH	23.46
C1	209	IFI27	29.1165
C2	209	IFI27	29.0776
C3	209	RSAD2	28.656
C4	209	RSAD2	28.6435
C5	209	IFI44	26.3871
C6	209	IFI44	26.3267
C7	209	IFI44L	25.8703
C8	209	IFI44L	25.8668
C9	209	GADPH	22.1558
C10	209	GADPH	22.095
D1	280	IFI27	23.6483
D2	280	IFI27	23.7048
D3	280	RSAD2	26.8315
D4	280	RSAD2	26.9071
D5	280	IFI44	26.0239
D6	280	IFI44	25.9746
D7	280	IFI44L	25.3909
D8	280	IFI44L	25.4469
D9	280	GADPH	22.6422
D10	280	GADPH	22.6168
E1	24	IFI27	25.6995
E2	24	IFI27	25.7201
E3	24	RSAD2	27.909
E4	24	RSAD2	27.8479
E5	24	IFI44	26.5272
E6	24	IFI44	26.46
E7	24	IFI44L	25.4616
E8	24	IFI44L	25.4137
E9	24	GADPH	22.6661
E10	24	GADPH	22.587
F1	92	IFI27	31.037
F2	92	IFI27	31.1219
F3	92	RSAD2	30.297
F4	92	RSAD2	30.302
F5	92	IFI44	28.3195
F6	92	IFI44	28.3313
F7	92	IFI44L	28.0058
F8	92	IFI44L	27.9848
F9	92	GADPH	23.3868
F10	92	GADPH	23.4673
G1	289	IFI27	33.3486
G2	289	IFI27	33.183
G3	289	RSAD2	31.826
G4	289	RSAD2	31.7318
G5	289	IFI44	29.5021
G6	289	IFI44	29.49
G7	289	IFI44L	29.4964
G8	289	IFI44L	29.7154
G9	289	GADPH	22.7198
G10	289	GADPH	22.5782
H1	250	IFI27	35.7166
H2	250	IFI27	35.3944
H3	250	RSAD2	33.3904
H4	250	RSAD2	33.1741
H5	250	IFI44	31.1346
H6	250	IFI44	31.2209
H7	250	IFI44L	29.9795
H8	250	IFI44L	29.9653
H9	250	GADPH	25.9411
H10	250	GADPH	26.0095
Plate 6
Well	Sample Name	Target Name	Cт
A1	Control	IFI27	35.1644
A2	Control	IFI27	35.2644
A3	Control	RSAD2	30.9318
A4	Control	RSAD2	30.996
A5	Control	IFI44	29.4028
A6	Control	IFI44	29.3843
A7	Control	IFI44L	30.0758
A8	Control	IFI44L	30.019
A9	Control	GAPDH	22.5412
A10	Control	GAPDH	22.6097
B1	240	IFI27	26.3375
B2	240	IFI27	26.2976
B3	240	RSAD2	27.4918
B4	240	RSAD2	27.4269
B5	240	IFI44	26.2772
B6	240	IFI44	26.2925
B7	240	IFI44L	25.0405
B8	240	IFI44L	25.1262
B9	240	GAPDH	22.8774
B10	240	GAPDH	22.899
C1	157	IFI27	28.2035
C2	157	IFI27	28.0826
C3	157	RSAD2	29.334
C4	157	RSAD2	29.2206
C5	157	IFI44	27.4954
C6	157	IFI44	27.4922
C7	157	IFI44L	26.9743
C8	157	IFI44L	27.0629
C9	157	GAPDH	23.6967
C10	157	GAPDH	23.6509
D1	251	IFI27	28.5788
D2	251	IFI27	28.5942
D3	251	RSAD2	29.2307
D4	251	RSAD2	29.2476
D5	251	IFI44	27.2814
D6	251	IFI44	27.2159
D7	251	IFI44L	26.5492
D8	251	IFI44L	26.5895
D9	251	GAPDH	23.1045
D10	251	GAPDH	23.0927
E1	117	IFI27	35.7599
E2	117	IFI27	35.7306
E3	117	RSAD2	32.9595
E4	117	RSAD2	32.9388
E5	117	IFI44	29.9326
E6	117	IFI44	29.8518
E7	117	IFI44L	30.8164
E8	117	IFI44L	30.9605
E9	117	GAPDH	22.6864
E10	117	GAPDH	22.6793
F1	248	IFI27	27.3941
F2	248	IFI27	27.3309
F3	248	RSAD2	28.603
F4	248	RSAD2	28.2692
F5	248	IFI44	33.0937
F6	248	IFI44	26.6726
F7	248	IFI44L	26.0374
F8	248	IFI44L	26.0548
F9	248	GAPDH	23.4101
F10	248	GAPDH	23.4242
G1	273	IFI27	30.2449
G2	273	IFI27	30.2732
G3	273	RSAD2	30.1658
G4	273	RSAD2	30.111
G5	273	IFI44	28.4607
G6	273	IFI44	28.3628
G7	273	IFI44L	27.1236
G8	273	IFI44L	27.1344
G9	273	GAPDH	22.7238
G10	273	GAPDH	22.8199
H1	226	IFI27	31.2739
H2	226	IFI27	31.2218
H3	226	RSAD2	29.936
H4	226	RSAD2	29.882
H5	226	IFI44	28.3084
H6	226	IFI44	28.3062
H7	226	IFI44L	28.1587
H8	226	IFI44L	28.1529
H9	226	GAPDH	22.9845
H10	226	GAPDH	23.0179
Plate 7
Well	Sample Name	Target Name	Cт
A1	Control	IFI27	34.9768
A2	Control	IFI27	35.5372
A3	Control	RSAD2	30.9081
A4	Control	RSAD2	31.0857
A5	Control	IFI44	29.4669
A6	Control	IFI44	29.5467
A7	Control	IFI44L	30.0337
A8	Control	IFI44L	30.0722
A9	Control	GAPDH	22.6453
A10	Control	GAPDH	22.6472
C1	51	IFI27	33.3569
C2	51	IFI27	33.4984
C3	51	RSAD2	30.9074
C4	51	RSAD2	30.9012
C5	51	IFI44	29.223
C6	51	IFI44	29.3173
C7	51	IFI44L	29.9385
C8	51	IFI44L	29.9404
C9	51	GAPDH	22.4702
C10	51	GAPDH	22.4332
D1	276	IFI27	29.007
D2	276	IFI27	29.0647
D3	276	RSAD2	28.7731
D4	276	RSAD2	28.7768
D5	276	IFI44	27.2129
D6	276	IFI44	27.1891
D7	276	IFI44L	26.409
D8	276	IFI44L	26.4809
D9	276	GAPDH	23.2968
D10	276	GAPDH	23.2753
E1	281	IFI27	36.3216
E2	281	IFI27	36.5584
E3	281	RSAD2	32.0266
E4	281	RSAD2	32.1153
E5	281	IFI44	29.9338
E6	281	IFI44	29.6569
E7	281	IFI44L	31.2115
E8	281	IFI44L	31.3474
E9	281	GAPDH	22.6014
E10	281	GAPDH	22.586
F1	178	IFI27	34.6862
F2	178	IFI27	34.4428
F3	178	RSAD2	31.9527
F4	178	RSAD2	31.8769
F5	178	IFI44	29.6866
F6	178	IFI44	29.7017
F7	178	IFI44L	30.571
F8	178	IFI44L	30.5088
F9	178	GAPDH	22.9392
F10	178	GAPDH	22.8618
G1	279	IFI27	36.4494
G2	279	IFI27	36.7992
G3	279	RSAD2	33.9806
G4	279	RSAD2	33.982
G5	279	IFI44	31.8716
G6	279	IFI44	31.6986
G7	279	IFI44L	32.5551
G8	279	IFI44L	32.3644
G9	279	GAPDH	24.9182
G10	279	GAPDH	24.9313
H1	267	IFI27	31.1822
H2	267	IFI27	31.202
H3	267	RSAD2	30.7344
H4	267	RSAD2	30.6802
H5	267	IFI44	28.993
H6	267	IFI44	28.9934
H7	267	IFI44L	28.2036
H8	267	IFI44L	28.17
H9	267	GAPDH	25.8393
H10	267	GAPDH	25.8844
Plate 8
Well	Sample Name	Target Name	Cт
A1	Control	IFI27	35.0458
A2	Control	IFI27	34.8604
A3	Control	RSAD2	31.006
A4	Control	RSAD2	31.2848
A5	Control	IFI44	29.6151
A6	Control	IFI44	29.5943
A7	Control	IFI44L	30.1498
A8	Control	IFI44L	30.2281
A9	Control	GAPDH	22.7097
A10	Control	GAPDH	22.7502
B1	68	IFI27	29.921	Patient sample was re-analyzed on plate 9
B2	68	IFI27	29.9333
B3	68	RSAD2	29.4109
B4	68	RSAD2	29.4172
B5	68	IFI44	27.8744
B6	68	IFI44	27.896
B7	68	IFI44L	27.4874
B8	68	IFI44L	27.4992
B9	68	GAPDH	23.2274
B10	68	GAPDH	23.2145
C1	196	IFI27	38.2001
C2	196	IFI27	37.9321
C3	196	RSAD2	34.7236
C4	196	RSAD2	34.691
C5	196	IFI44	31.708
C6	196	IFI44	31.9051
C7	196	IFI44L	28.0279
C8	196	IFI44L	33.6875
C9	196	GAPDH	23.128
C10	196	GAPDH	23.1598
D1	228	IFI27	27.3022
D2	228	IFI27	27.3159
D3	228	RSAD2	28.1479
D4	228	RSAD2	28.3161
D5	228	IFI44	26.5204
D6	228	IFI44	26.4883
D7	228	IFI44L	25.7348
D8	228	IFI44L	25.8813
D9	228	GAPDH	22.773
D10	228	GAPDH	22.8059
E1	176	IFI27	31.7605
E2	176	IFI27	31.7779
E3	176	RSAD2	29.5442
E4	176	RSAD2	29.6004
E5	176	IFI44	28.4428
E6	176	IFI44	28.4144
E7	176	IFI44L	28.0087
E8	176	IFI44L	28.0578
E9	176	GAPDH	23.6499
E10	176	GAPDH	23.6478
F1	210	IFI27	29.2728
F2	210	IFI27	29.2128
F3	210	RSAD2	28.7266
F4	210	RSAD2	28.8121
F5	210	IFI44	27.0345
F6	210	IFI44	27.0825
F7	210	IFI44L	26.4614
F8	210	IFI44L	26.4661
F9	210	GAPDH	22.361
F10	210	GAPDH	22.2831
G1	161	IFI27	34.9193	Patient sample was re-analyzed on plate 9
G2	161	IFI27	34.9455
G3	161	RSAD2	33.6621
G4	161	RSAD2	33.863
G5	161	IFI44	30.975
G6	161	IFI44	30.975
G7	161	IFI44L	31.9177
G8	161	IFI44L	31.8209
G9	161	GAPDH	24.9061
G10	161	GAPDH	24.91
H1	214	IFI27	33.9657
H2	214	IFI27	34.1799
H3	214	RSAD2	32.8123
H4	214	RSAD2	32.7638
H5	214	IFI44	30.3631
H6	214	IFI44	30.3448
H7	214	IFI44L	31.1534
H8	214	IFI44L	30.9951
H9	214	GAPDH	23.0749
H10	214	GAPDH	23.1166
Plate 9
Well	Sample Name	Target Name	Cт
A1	Control	IFI27	35.0322
A2	Control	IFI27	35.6086
A3	Control	RSAD2	30.8806
A4	Control	RSAD2	30.9142
A5	Control	IFI44	29.2994
A6	Control	IFI44	29.3207
A7	Control	IFI44L	29.909
A8	Control	IFI44L	29.9598
A9	Control	GADPH	22.3755
A10	Control	GADPH	22.4735
B1	208	IFI27	36.2389
B2	208	IFI27	36.9415
B3	208	RSAD2	33.6953
B4	208	RSAD2	33.8155
B5	208	IFI44	31.8491
B6	208	IFI44	31.7935
B7	208	IFI44L	31.2252
B8	208	IFI44L	31.3535
B9	208	GADPH	26.9663
B10	208	GADPH	26.9615
C1	1	IFI27	33.6677
C2	1	IFI27	33.5994
C3	1	RSAD2	32.469
C4	1	RSAD2	32.4191
C5	1	IFI44	29.709
C6	1	IFI44	29.697
C7	1	IFI44L	29.9317
C8	1	IFI44L	29.9825
C9	1	GADPH	22.544
C10	1	GADPH	22.5195
D1	257	IFI27	31.6512
D2	257	IFI27	31.5124
D3	257	RSAD2	30.6622
D4	257	RSAD2	30.6776
D5	257	IFI44	28.5516
D6	257	IFI44	28.5669
D7	257	IFI44L	28.1091
D8	257	IFI44L	28.0986
D9	257	GADPH	23.5255
D10	257	GADPH	23.4922
E1	212	IFI27	33.9921
E2	212	IFI27	33.9027
E3	212	RSAD2	32.1627
E4	212	RSAD2	32.3123
E5	212	IFI44	30.2377
E6	212	IFI44	30.1546
E7	212	IFI44L	30.9686
E8	212	IFI44L	30.895
E9	212	GADPH	23.3397
E10	212	GADPH	23.3087
F1	68	IFI27	30.1777
F2	68	IFI27	30.0866
F3	68	RSAD2	29.6856
F4	68	RSAD2	29.7859
F5	68	IFI44	28.213
F6	68	IFI44	28.2131
F7	68	IFI44L	27.9199
F8	68	IFI44L	27.9812
F9	68	GADPH	23.4013
F10	68	GADPH	23.675
G1	161	IFI27	32.6462
G2	161	IFI27	32.7309
G3	161	RSAD2	30.3184
G4	161	RSAD2	30.2825
G5	161	IFI44	28.4799
G6	161	IFI44	28.323
G7	161	IFI44L	29.0345
G8	161	IFI44L	29.0868
G9	161	GADPH	21.8314
G10	161	GADPH	21.8285
